# Supplementary material for: Fruitomics: The Importance of Combining Sensory and Chemical Analyses in Assessing Cold Storage Responses of Six Peach (Prunus persica L. Batsch) Cultivars
Source: MDPI journal article supplement (doi:10.3390/foods11172554), 2022-08-24
Supplement: s1 [file s1]

## SUPPLEMENTARY MATERIALS

*Type of the Paper (Article)*

# Fruitomics: the importance of combining sensory and chemical analyses in assessing cold storage responses of six peach (*Prunus persica* L. Batsch) cultivars

Antonella Muto<sup>1#</sup>, Sarah R. Christofides<sup>2#</sup>, Tiziana Maria Sirangelo<sup>1,3</sup>, Lucia Bartella<sup>4</sup>, Carsten Muller<sup>2</sup>, Leonardo Di Donna<sup>4</sup>, Innocenzo Muzzalupo<sup>5</sup>, Leonardo Bruno<sup>1</sup>, Antonio Ferrante<sup>6</sup>, Adriana A. C. Chiappetta<sup>1</sup>, Maria Beatrice Bitonti<sup>1</sup>, Hilary J. Rogers<sup>2\*</sup>, Natasha Damiana Spadafora<sup>1,7,8</sup>

<sup>1</sup> Department of Biology, Ecology and Earth Sciences, University of Calabria, Via Ponte P. Bucci 6b, 87036 Arcavacata di Rende, Cosenza, Italy

<sup>2</sup> School of Biosciences, Cardiff University, Sir Martin Evans Building, Museum Avenue, Cardiff, United Kingdom

<sup>3</sup> CREA—Council for Agricultural Research and Agricultural Economy Analysis, Genomics and Bioinformatics research center, 26836, Montanaso Lombardo Lodi, Italy

<sup>4</sup> Department of Chemistry and Chemical Technologies, University of Calabria, Via Ponte P. Bucci 15c, 87036 Arcavacata di Rende Cosenza, Italy

<sup>5</sup> CREA—Council for Agricultural Research and Agricultural Economy Analysis, Forestry and Wood research center, 87036 Rende (CS), Italy

<sup>6</sup> Department of Agricultural and Environmental Science – Production, Landscape, Agroenergy, Università degli Studi di Milano, Via Celoria 2, 20133, Milan, Italy

<sup>7</sup> Markes International Ltd, 1000B Central Park, Western Avenue, CF31 3RT, Bridgend, United Kingdom

<sup>8</sup> Department of Chemical, Pharmaceutical and Agricultural Sciences, University of Ferrara, 44121, Ferrara, Italy

\* Correspondence: rogershj@cardiff.ac.uk; Tel: +44 (0)2920876352

# These authors contributed equally to this work.

**Table S1.** Confusion matrix from a Random Forest™ classification of peach cultivars and storage treatments based on intrinsic quality characters.

|             |    | Sagittaria |    | Big Bang |    | Carene |    | Big Top |    | Summer Rich |    | Rome Star |    | % Correct |
|-------------|----|------------|----|----------|----|--------|----|---------|----|-------------|----|-----------|----|-----------|
|             |    | D0         | D7 | D0       | D7 | D0     | D7 | D0      | D7 | D0          | D7 | D0        | D7 |           |
| Sagittaria  | D0 | 2          | 1  | 0        | 0  | 0      | 0  | 0       | 0  | 0           | 0  | 0         | 0  | 67        |
| Sagittaria  | D7 | 0          | 3  | 0        | 0  | 0      | 0  | 0       | 0  | 0           | 0  | 0         | 0  | 100       |
| Big Bang    | D0 | 0          | 0  | 3        | 0  | 0      | 0  | 0       | 0  | 0           | 0  | 0         | 0  | 100       |
| Big Bang    | D7 | 0          | 0  | 0        | 3  | 0      | 0  | 0       | 0  | 0           | 0  | 0         | 0  | 100       |
| Carene      | D0 | 0          | 0  | 0        | 0  | 3      | 0  | 0       | 0  | 0           | 0  | 0         | 0  | 100       |
| Carene      | D7 | 0          | 0  | 0        | 0  | 0      | 3  | 0       | 0  | 0           | 0  | 0         | 0  | 100       |
| Big Top     | D0 | 0          | 0  | 0        | 0  | 0      | 0  | 2       | 1  | 0           | 0  | 0         | 0  | 67        |
| Big Top     | D7 | 0          | 0  | 0        | 0  | 0      | 0  | 0       | 3  | 0           | 0  | 0         | 0  | 100       |
| Summer Rich | D0 | 0          | 0  | 0        | 0  | 0      | 0  | 1       | 0  | 2           | 0  | 0         | 0  | 67        |
| Summer Rich | D7 | 0          | 0  | 0        | 0  | 0      | 0  | 0       | 1  | 0           | 2  | 0         | 0  | 67        |
| Rome Star   | D0 | 0          | 0  | 0        | 1  | 0      | 0  | 0       | 0  | 0           | 0  | 2         | 0  | 67        |
| Rome Star   | D7 | 0          | 0  | 0        | 0  | 0      | 0  | 0       | 0  | 1           | 0  | 0         | 2  | 67        |

Rows represent true categories; columns represent predicted categories. The number of replicates correctly predicted for each category is highlighted in green. Incorrectly predicted replicates are highlighted in red. Cultivars are shown in order of ripening. Note that replicate numbers differ between cultivars based on the number of panellists available for each session.

**Table S2.** Confusion matrix from a Random Forest™ classification of peach cultivars, based on sensorial descriptors.

|                | Sagittaria | Big Bang | Carene | Big Top | Summer<br>Rich | Rome<br>Star | No. reps | %<br>Correct |
|----------------|------------|----------|--------|---------|----------------|--------------|----------|--------------|
| Sagittaria     | 15         | 2        | 0      | 1       | 0              | 1            | 19       | 79           |
| Big Bang       | 1          | 12       | 2      | 2       | 1              | 1            | 19       | 63           |
| Carene         | 2          | 0        | 10     | 2       | 0              | 2            | 16       | 63           |
| Big Top        | 0          | 1        | 3      | 15      | 1              | 1            | 21       | 71           |
| Summer<br>Rich | 0          | 0        | 0      | 1       | 8              | 3            | 12       | 67           |
| Rome<br>Star   | 2          | 1        | 1      | 1       | 3              | 4            | 12       | 33           |

Rows represent true categories; columns represent predicted categories. The number of replicates correctly predicted for each category is highlighted in green. Incorrectly predicted replicates are highlighted in red. Cultivars are shown in order of ripening from early to late. Note that replicate numbers differ between cultivars based on the number of panellists available for each session.

**Table S3.** Confusion matrix from a Random Forest™ classification of peach cultivars and storage treatments based on sensorial descriptors.

|             |    | Sagittaria |    | Big Bang |    | Carene |    | Big Top |    | Summer Rich |    | Rome Star |    | No. reps | % Correct |
|-------------|----|------------|----|----------|----|--------|----|---------|----|-------------|----|-----------|----|----------|-----------|
|             |    | D0         | D7 | D0       | D7 | D0     | D7 | D0      | D7 | D0          | D7 | D0        | D7 |          |           |
| Sagittaria  | D0 | 8          | 0  | 1        | 0  | 0      | 0  | 0       | 0  | 0           | 0  | 0         | 0  | 9        | 89        |
| Sagittaria  | D7 | 2          | 5  | 0        | 1  | 0      | 0  | 1       | 0  | 0           | 0  | 1         | 0  | 10       | 50        |
| Big Bang    | D0 | 2          | 0  | 9        | 0  | 0      | 0  | 0       | 0  | 0           | 0  | 0         | 0  | 11       | 82        |
| Big Bang    | D7 | 0          | 2  | 0        | 1  | 2      | 0  | 1       | 0  | 0           | 1  | 1         | 0  | 8        | 13        |
| Carene      | D0 | 0          | 1  | 0        | 1  | 3      | 0  | 3       | 0  | 0           | 0  | 1         | 0  | 9        | 33        |
| Carene      | D7 | 0          | 0  | 0        | 0  | 0      | 6  | 0       | 1  | 0           | 0  | 0         | 0  | 7        | 86        |
| Big Top     | D0 | 0          | 2  | 0        | 0  | 2      | 0  | 6       | 0  | 0           | 0  | 1         | 0  | 11       | 55        |
| Big Top     | D7 | 0          | 0  | 0        | 0  | 0      | 1  | 0       | 9  | 0           | 0  | 0         | 0  | 10       | 90        |
| Summer Rich | D0 | 0          | 0  | 0        | 1  | 0      | 0  | 0       | 0  | 1           | 3  | 1         | 1  | 7        | 14        |
| Summer Rich | D7 | 0          | 0  | 0        | 0  | 0      | 0  | 0       | 0  | 3           | 1  | 0         | 1  | 5        | 20        |
| Rome Star   | D0 | 1          | 2  | 0        | 1  | 1      | 0  | 1       | 0  | 1           | 0  | 0         | 0  | 7        | 0         |
| Rome Star   | D7 | 0          | 0  | 0        | 0  | 1      | 0  | 1       | 0  | 0           | 3  | 0         | 0  | 5        | 0         |

Rows represent true categories; columns represent predicted categories. The number of replicates correctly predicted for each category is highlighted in green. Incorrectly predicted replicates are highlighted in red. Cultivars are shown in order of ripening. Note that replicate numbers differ between cultivars based on the number of panellists available for each session.

**Table S5:** Peach and nectarine sensory attributes and description used for sensory analysis.

| Attributes  | Description                                                                                   |
|-------------|-----------------------------------------------------------------------------------------------|
| Fruitiness  | Strength of fruity flavour                                                                    |
| Crunchiness | Hard texture with a low-pitched sound                                                         |
| Firmness    | Peak force required during the first sample compression cycle                                 |
| Sweetness   | Fundamental taste detectable on the tip of the tongue, characteristic of sugars               |
| Acidity     | fundamental taste detectable on the sides of the tongue (e.g. citric acid)                    |
| Juiciness   | Amount of juice released on the first chews of the sample                                     |
| Bitterness  | Characteristic flavor reminding of unripe fruit, more or less pleasant depending on intensity |
| Astringency | A puckering sensation in the mounth characteristic of tannins                                 |
| Harmony     | Overall liking of the fruit                                                                   |

**Table S6.** Mean of three biological replicates of the relative abundance of each VOC detected across each cultivar-storage combination, plus/minus standard deviation. Values have been normalised to total area and square rooted.

|                                | Sagittaria  |             | Big Bang    |             | Carene      |             | Big Top     |             | Summer Rich |             | Rome Star   |             |
|--------------------------------|-------------|-------------|-------------|-------------|-------------|-------------|-------------|-------------|-------------|-------------|-------------|-------------|
|                                | D0          | D7          |
| 2,4-Dimethyl-1-heptene         | -           | -           | 0.21 ± 0.16 | -           | -           | -           | -           | -           | -           | -           | 1.06 ± 0.90 | -           |
| Isoamyl acetate                | 1.53 ± 1.32 | 1.11 ± 0.95 | 1.88 ± 1.09 | 2.21 ± 0.13 | -           | 0.78 ± 0.72 | -           | -           | -           | -           | -           | -           |
| 3-Heptanone                    | -           | 0.51 ± 0.44 | -           | -           | -           | 0.72 ± 0.75 | -           | -           | -           | -           | -           | -           |
| trans-1,2-Diethyl cyclopentane | -           | -           | 0.33 ± 0.28 | -           | -           | -           | 1.51 ± 1.69 | -           | -           | 0.76 ± 0.06 | 0.83 ± 0.81 | -           |
| Amyl acetate                   | -           | 0.40 ± 0.32 | -           | 1.12 ± 0.29 | -           | 0.50 ± 0.43 | -           | -           | -           | 1.77 ± 0.54 | 1.06 ± 0.92 | -           |
| cis-6-Nonenol                  | -           | -           | -           | -           | 0.52 ± 0.43 | 0.6 ± 0.71  | -           | -           | -           | -           | -           | -           |
| Methyl caproate                | -           | -           | -           | -           | -           | -           | -           | -           | -           | -           | -           | 1.12 ± 0.95 |
| 3-Ethyl-2-methylheptane        | -           | -           | -           | -           | -           | -           | -           | -           | 0.51 ± 0.42 | -           | 0.75 ± 0.62 | 0.5 ± 0.41  |
| Butylcyclopentane              | -           | 0.48 ± 0.40 | -           | -           | 1.26 ± 1.13 | -           | -           | -           | -           | -           | -           | -           |
| 4,5-Dimethyloctane             | 1.01 ± 0.86 | 0.10 ± 0.13 | -           | -           | -           | -           | -           | -           | -           | -           | -           | -           |
| Camphene                       | -           | 0.51 ± 0.43 | -           | -           | -           | -           | -           | 0.98 ± 0.82 | 1.17 ± 0.35 | 1.37 ± 0.27 | 1.95 ± 0.15 | 0.69 ± 0.58 |
| 3-Octanone                     | -           | -           | -           | 0.50 ± 0.45 | -           | -           | -           | -           | -           | -           | -           | -           |
| Isovalerone                    | -           | 0.33 ± 0.26 | -           | -           | 3.08 ± 0.50 | -           | 1.25 ± 1.06 | 1.81 ± 1.77 | 1.23 ± 1.62 | 0.92 ± 0.78 | 1.91 ± 2.24 | 1.52 ± 1.57 |
| α-Pinene                       | -           | -           | 0.36 ± 0.33 | 1.96 ± 1.80 | -           | -           | -           | -           | 1.76 ± 0.68 | 0.74 ± 0.62 | 3.05 ± 0.75 | -           |
| Butylcyclooctane               | -           | -           | -           | -           | -           | -           | 3.52 ± 1.79 | -           | -           | -           | -           | -           |
| β-Myrcene                      | -           | -           | 0.82 ± 0.39 | 1.25 ± 0.86 | -           | 2.00 ± 1.75 | -           | -           | 1.54 ± 1.31 | 1.73 ± 1.48 | -           | -           |
| 3-Methylnonane                 | -           | -           | 0.61 ± 0.59 | 1.92 ± 1.67 | 2.30 ± 3.13 | -           | 2.68 ± 3.26 | -           | -           | 1.38 ± 1.20 | 2.00 ± 1.23 | -           |
| 3,5-Dimethylheptane            | -           | -           | -           | -           | -           | -           | -           | -           | -           | -           | 1.37 ± 1.37 | -           |
| terpene 1                      | -           | -           | -           | -           | 0.72 ± 0.60 | -           | -           | -           | -           | -           | -           | -           |
| Sulcatol                       | -           | -           | -           | 0.59 ± 0.50 | -           | -           | -           | -           | -           | -           | -           | -           |
| trans-3-Hexenyl acetate        | -           | -           | -           | 0.34 ± 0.27 | -           | -           | -           | -           | -           | 1.76 ± 0.65 | -           | -           |
| α-Phellandrene                 | -           | -           | -           | 0.74 ± 0.81 | 0.92 ± 0.07 | -           | 1.80 ± 1.29 | 3.81 ± 0.62 | 0.60 ± 0.65 | -           | 1.10 ± 0.93 | 3.34 ± 1.44 |
| cis-3-Hexenyl Acetate          | 1.56 ± 1.22 | 0.27 ± 0.21 | 0.95 ± 1.38 | 0.57 ± 0.63 | -           | 0.69 ± 0.60 | -           | -           | 1.61 ± 0.38 | 1.74 ± 0.57 | 1.24 ± 1.37 | 1.78 ± 1.00 |
| 3-Hexyne                       | -           | -           | -           | -           | -           | -           | -           | -           | 0.73 ± 0.63 | -           | -           | -           |

|                        |             |             |             |             |             |             |             |             |             |             |             |             |
|------------------------|-------------|-------------|-------------|-------------|-------------|-------------|-------------|-------------|-------------|-------------|-------------|-------------|
| Phenyl carbamate       | -           | -           | -           | -           | -           | 1.46 ± 1.26 | -           | -           | -           | -           | -           | -           |
| Hexyl acetate          | 1.30 ± 0.63 | 0.34 ± 0.28 | 0.92 ± 0.05 | 1.34 ± 0.91 | -           | -           | -           | 1.12 ± 1.01 | 3.33 ± 0.71 | 3.72 ± 0.15 | 1.48 ± 1.84 | -           |
| 2,6-Dimethylnonane     | 2.24 ± 2.65 | 2.19 ± 0.34 | 1.00 ± 1.08 | 1.12 ± 1.11 | 2.93 ± 2.55 | 2.01 ± 1.72 | -           | -           | 1.23 ± 1.37 | -           | -           | -           |
| (E)-2-Hexenyl acetate  | 0.54 ± 0.44 | -           | -           | -           | -           | -           | -           | -           | -           | -           | -           | -           |
| Isobutyl isovalerate   | -           | -           | -           | -           | -           | 0.45 ± 0.38 | -           | -           | -           | -           | -           | -           |
| 5-Undecene, (E)-       | 0.74 ± 0.69 | -           | -           | -           | -           | -           | -           | -           | -           | -           | -           | -           |
| 4-Undecene, (E)-       | 2.01 ± 2.50 | -           | -           | -           | -           | -           | -           | -           | -           | -           | -           | -           |
| 2-Cyclopropylhexane    | -           | -           | -           | -           | -           | -           | -           | -           | -           | -           | -           | 1.01 ± 1.03 |
| p-Cymene               | -           | 0.63 ± 0.53 | -           | -           | -           | -           | -           | -           | -           | -           | 0.75 ± 0.63 | -           |
| 5-Ethyl-2-methyloctane | -           | -           | -           | -           | 1.45 ± 1.25 | 1.29 ± 1.15 | 1.93 ± 0.50 | -           | -           | -           | -           | -           |
| β-Ocimene              | -           | -           | 1.16 ± 1.56 | -           | 0.88 ± 0.80 | 0.77 ± 0.10 | 0.77 ± 0.65 | -           | 1.21 ± 1.43 | -           | -           | 0.65 ± 0.54 |
| alkane 1               | -           | -           | 2.10 ± 1.80 | 1.18 ± 1.56 | 2.37 ± 2.29 | 3.27 ± 0.82 | -           | 1.31 ± 1.17 | -           | -           | 1.04 ± 0.88 | -           |
| Spiro[4.5]decane       | -           | -           | -           | 0.51 ± 0.49 | 0.92 ± 0.96 | -           | -           | -           | -           | 0.63 ± 0.53 | -           | -           |
| Indene                 | 0.60 ± 0.02 | 0.59 ± 0.01 | -           | 0.77 ± 0.04 | 1.09 ± 1.04 | 0.42 ± 0.34 | -           | 1.46 ± 0.32 | -           | -           | -           | -           |
| Isobutylcyclopentane   | 0.35 ± 0.31 | -           | -           | -           | -           | -           | -           | -           | -           | -           | -           | -           |
| γ-Caprolactone         | 0.90 ± 0.76 | -           | -           | -           | -           | 2.13 ± 1.76 | -           | -           | 1.09 ± 1.09 | 0.99 ± 0.26 | 3.69 ± 1.41 | 2.18 ± 0.58 |
| Butyrolactone          | 0.54 ± 0.10 | -           | 1.57 ± 2.67 | -           | -           | -           | -           | -           | -           | -           | -           | -           |
| Tetrahydrolinalool     | 0.79 ± 0.67 | 0.51 ± 0.42 | -           | -           | -           | -           | -           | -           | -           | -           | -           | -           |
| Linalool               | 4.75 ± 2.15 | 0.59 ± 0.50 | 7.11 ± 1.11 | 5.73 ± 0.22 | 1.4 ± 1.20  | 1.33 ± 0.63 | 3.45 ± 3.03 | -           | 3.69 ± 1.65 | 1.12 ± 0.97 | 2.10 ± 0.33 | 1.34 ± 1.33 |
| Isoamyl valerianate    | -           | 0.33 ± 0.26 | 0.48 ± 0.58 | 0.49 ± 0.47 | 0.77 ± 0.73 | 0.78 ± 0.27 | -           | -           | -           | -           | -           | -           |
| 2-Octenal, (E)-        | -           | 2.83 ± 1.10 | -           | -           | -           | 0.39 ± 0.31 | -           | -           | 0.89 ± 0.76 | 0.64 ± 0.53 | -           | -           |
| Hotrienol              | -           | -           | 2.00 ± 0.9  | 1.26 ± 1.69 | -           | -           | -           | -           | -           | -           | -           | -           |
| Methyl 4-octenoate     | -           | -           | -           | -           | -           | -           | -           | -           | -           | 1.99 ± 0.26 | -           | 0.91 ± 0.92 |
| 3,7-Dimethyldecane     | 2.43 ± 3.21 | 0.50 ± 0.41 | -           | -           | -           | 1.40 ± 2.01 | -           | -           | -           | -           | 1.43 ± 2.42 | -           |
| Methyl octanoate       | 0.44 ± 0.37 | 0.51 ± 0.43 | -           | 0.37 ± 0.30 | -           | -           | -           | -           | 2.02 ± 0.20 | 1.19 ± 0.08 | 1.56 ± 0.60 | 1.67 ± 0.59 |
| Allo-Ocimene           | 0.56 ± 0.46 | 0.38 ± 0.31 | 0.46 ± 0.51 | 0.61 ± 0.17 | -           | 0.44 ± 0.36 | 1.04 ± 0.88 | 1.53 ± 0.27 | 1.08 ± 0.32 | -           | -           | -           |
| Cosmene                | -           | -           | 0.46 ± 0.06 | -           | -           | -           | -           | -           | -           | -           | -           | -           |
| 5-Ethyldecane          | -           | -           | -           | -           | -           | 2.02 ± 2.44 | -           | -           | -           | -           | -           | -           |
| 4-Ethyldecane          | 2.15 ± 1.07 | 0.42 ± 0.35 | 0.57 ± 0.61 | -           | -           | 2.40 ± 0.43 | -           | 1.89 ± 1.61 | -           | -           | -           | -           |
| n-Amyl isovalerate     | -           | -           | 0.46 ± 0.75 | 1.06 ± 1.24 | 1.73 ± 0.97 | 0.52 ± 0.43 | -           | -           | -           | -           | -           | -           |
| Methylundecane         | -           | -           | -           | -           | 0.75 ± 0.62 | 2.46 ± 2.16 | 1.65 ± 1.79 | -           | 1.57 ± 1.43 | 0.73 ± 0.61 | 1.77 ± 2.35 | -           |

|                                     |             |             |             |             |             |             |             |             |             |             |             |             |
|-------------------------------------|-------------|-------------|-------------|-------------|-------------|-------------|-------------|-------------|-------------|-------------|-------------|-------------|
| L-camphor                           | -           | 0.35 ± 0.28 | -           | -           | -           | -           | -           | 2.69 ± 3.07 | -           | -           | -           | -           |
| Benzyl acetate                      | -           | 2.41 ± 0.52 | -           | -           | -           | 0.77 ± 0.64 | -           | -           | -           | 0.59 ± 0.49 | -           | -           |
| (3Z,5E)-1,3,5-Undecatriene          | -           | -           | -           | 0.32 ± 0.26 | -           | -           | -           | -           | -           | -           | -           | -           |
| 2-Methyladamantane                  | 1.00 ± 0.34 | -           | 0.77 ± 0.65 | 0.75 ± 0.66 | 0.99 ± 0.84 | -           | -           | -           | -           | 0.64 ± 0.54 | 0.76 ± 0.63 | -           |
| 1-p-Tolylethanone                   | -           | 1.05 ± 0.12 | -           | -           | -           | -           | -           | -           | -           | -           | -           | -           |
| Dihydrojasnone                      | -           | 0.33 ± 0.27 | -           | -           | -           | -           | -           | -           | -           | 1.86 ± 0.50 | -           | -           |
| Ethyl octanoate                     | -           | 0.50 ± 0.42 | 0.27 ± 0.22 | 0.46 ± 0.37 | -           | -           | -           | 3.62 ± 1.38 | 2.54 ± 2.25 | 1.78 ± 0.91 | -           | 4.25 ± 1.18 |
| 2-Nonenal, (E)-                     | -           | 1.10 ± 0.01 | -           | -           | 0.76 ± 0.64 | -           | -           | 1.22 ± 1.03 | -           | 1.49 ± 0.64 | -           | -           |
| α-Terpineol                         | 2.38 ± 2.49 | 0.77 ± 0.20 | 2.25 ± 0.74 | 2.03 ± 1.84 | -           | -           | -           | -           | 0.77 ± 0.65 | 2.98 ± 2.58 | -           | -           |
| 2,4-Dimethylundecane                | -           | -           | -           | 0.40 ± 0.34 | -           | -           | -           | -           | -           | -           | -           | -           |
| Ethylhexyl 2-propenoate             | 0.48 ± 0.39 | 2.42 ± 2.10 | -           | -           | -           | -           | -           | -           | -           | 0.65 ± 0.54 | -           | -           |
| 2,4-Decadienal, (E,E)-              | -           | 0.61 ± 0.20 | -           | -           | -           | -           | -           | -           | -           | -           | -           | -           |
| cis-3-Hexenyl valerate              | -           | -           | 0.39 ± 0.33 | -           | -           | -           | -           | -           | -           | -           | -           | -           |
| cis-3-Hexenyl isovalerate           | 0.74 ± 0.23 | 0.78 ± 0.66 | 1.29 ± 0.12 | 2.17 ± 2.06 | 1.25 ± 1.06 | 1 ± 0.60    | -           | -           | 1.65 ± 0.04 | 1.78 ± 0.32 | -           | 1.23 ± 1.05 |
| 1-Ethyldecahydronaphthalene , (Z,E) | -           | -           | -           | 0.45 ± 0.41 | -           | -           | 1.09 ± 0.91 | -           | -           | -           | -           | -           |
| Hexyl isovalerate                   | 2.12 ± 1.77 | 3.21 ± 2.79 | 0.47 ± 0.17 | 0.50 ± 0.11 | 1.37 ± 1.56 | 0.88 ± 0.47 | 0.72 ± 0.70 | -           | -           | 0.97 ± 0.83 | -           | 1.31 ± 0.15 |
| trans-2-Hexenyl valerate            | -           | 0.79 ± 0.67 | 1.12 ± 0.63 | 1.04 ± 0.87 | -           | -           | -           | -           | -           | -           | -           | -           |
| Phenoxethol                         | 1.20 ± 1.01 | 1.43 ± 1.26 | -           | -           | -           | -           | -           | -           | -           | -           | -           | -           |
| Cyclododecene                       | -           | 0.72 ± 0.61 | 0.70 ± 0.89 | 0.50 ± 0.53 | -           | 0.52 ± 0.49 | -           | 1.15 ± 1.00 | -           | 1.07 ± 0.91 | -           | 0.9 ± 0.86  |
| 4-Methyldodecane                    | -           | -           | 0.32 ± 0.26 | -           | 3.03 ± 2.62 | -           | 0.92 ± 0.78 | 1.45 ± 1.34 | -           | 2.41 ± 0.35 | -           | -           |
| Carvone                             | -           | 0.56 ± 0.15 | -           | -           | -           | 0.49 ± 0.46 | -           | -           | -           | -           | -           | -           |
| Amyl caproate                       | -           | -           | -           | 0.61 ± 0.07 | -           | -           | -           | -           | -           | -           | -           | -           |
| Anethole                            | -           | 0.82 ± 0.22 | -           | -           | -           | 1.34 ± 1.44 | -           | -           | -           | -           | -           | -           |
| 2-Undecanone                        | 0.68 ± 0.58 | 0.7 ± 0.59  | -           | -           | -           | -           | -           | -           | -           | -           | -           | -           |
| Theaspirane                         | -           | -           | 0.27 ± 0.20 | -           | -           | -           | -           | -           | -           | -           | -           | -           |
| Methyl 4-decenoate                  | -           | -           | -           | -           | -           | -           | -           | -           | -           | 1.53 ± 0.21 | -           | -           |
| Nonyl acetate                       | -           | -           | -           | -           | -           | -           | -           | -           | -           | -           | 0.82 ± 0.69 | 0.94 ± 0.91 |
| Bicyclohexane                       | -           | -           | 0.62 ± 0.35 | 0.85 ± 0.72 | 1.31 ± 1.11 | 0.92 ± 0.77 | 2.35 ± 1.3  | -           | 1.08 ± 0.57 | 0.72 ± 0.61 | -           | 0.89 ± 0.74 |
| 6-Dodecanone                        | -           | 0.47 ± 0.02 | -           | -           | -           | -           | -           | -           | -           | -           | -           | -           |
| p-Isopropenylacetophenone           | -           | 1.04 ± 0.37 | -           | -           | -           | -           | -           | -           | 0.92 ± 0.77 | -           | -           | -           |
| Heptyl isovalerate                  | -           | -           | 0.65 ± 0.55 | 0.61 ± 0.12 | 0.97 ± 0.09 | 0.87 ± 0.24 | -           | -           | -           | -           | -           | -           |



[illegible]

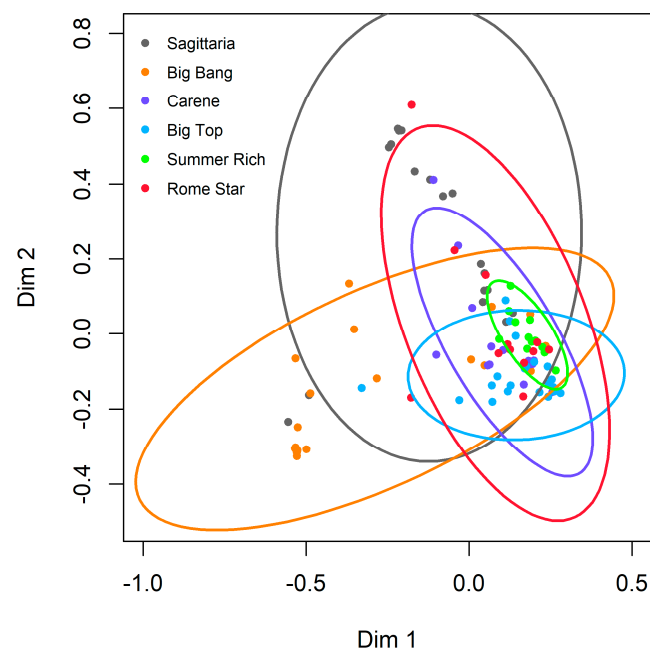

**Figure S1.** Sensory descriptor variation among cultivars. Fruitiness, Crunchiness, Firmness, Sweetness, Acidity, Juiciness, Bitterness, Astringency and Harmony, were evaluated by a team of trained panellists before (D0) and after (D7) storage; storage was for 7 days at 1 °C followed by a 36 h recovery at 20 °C. Cultivars are shown in order of ripening. Multi dimensional scaling (MDS) plot based on the Random Forest™ cultivar classification proximity matrix when D0 and D7 time points are analysed together.
